# Supplementary material
Source: HighWire-hosted journal article supplement (https://erj.ersjournals.com/content/58/3/2100304)
Supplement: inline-supplementary-material-1 [file inline-supplementary-material-1.pdf]

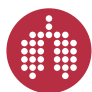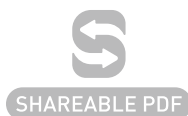

# When biology meets behaviour: can medication adherence mask the contribution of pharmacogenetic effects in asthma?

Job F.M. van Boven<sup>1,2</sup>, Boudewijn J.H. Dierick<sup>1</sup> and Omar S. Usmani<sup>3</sup>

<sup>1</sup>Dept of Clinical Pharmacy and Pharmacology, Groningen Research Institute for Asthma and COPD (GRIAC), University Medical Center Groningen, University of Groningen, Groningen, The Netherlands. <sup>2</sup>Medication Adherence Expertise Center of the northern Netherlands (MAECON), Groningen, The Netherlands. <sup>3</sup>Imperial College London and Royal Brompton Hospital, London, UK.

Job F.M. van Boven (j.f.m.van.boven@rug.nl)

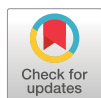

Shareable abstract (@ERSpublications)

**Medication adherence and inhaler technique may confound, in both a positive and a negative manner, outcomes of pharmacogenetic asthma studies. The importance of understanding patient behaviour when interpreting their biology should be emphasised.** <https://bit.ly/3tQdh1p>

**Cite this article as:** van Boven JFM, Dierick BJH, Usmani OS. When biology meets behaviour: can medication adherence mask the contribution of pharmacogenetic effects in asthma?. *Eur Respir J* 2021; 58: 2100304 [DOI: 10.1183/13993003.00304-2021].

This single-page version can be shared freely online.

Copyright ©The authors 2021. For reproduction rights and permissions contact [permissions@ersnet.org](mailto:permissions@ersnet.org)

Received: 31 Jan 2021  
Accepted: 8 Feb 2021

## To the Editor:

We read the study of RUFFLES *et al.* [1] with great interest. The authors undertook one of the first randomised controlled trials (RCTs) assessing the potential benefit of personalised prescription of bronchodilators according to Arg16Gly beta-2 genotype in adolescent patients with asthma. Following a 1-month run-in with inhaled corticosteroid (ICS) monotherapy, the intervention group received a bronchodilator according to their genotype, where AA and AG genotypes received an oral leukotriene antagonist (LTRA), montelukast, and GG genotype received an inhaled long-acting  $\beta_2$ -agonist (LABA), salmeterol. The control group received usual care based on the British Thoracic Society guidelines, where addition of a LABA is first choice when patients are uncontrolled on ICS alone. The authors found a small but significant ( $p=0.048$ ) benefit on the Pediatric Asthma Quality of Life Questionnaire in the intervention group.
